# Supplementary material for: Production of solid-stabilised emulsions through rotational membrane emulsification: influence of particle adsorption kinetics
Source: Royal Society of Chemistry journal article supplement (doi:10.1039/c1sm06547e), 2011-12-08
Supplement: c1sm06547e.pdf [file c1sm06547e.pdf]

**Supplementary information for RME paper – Figures A to C**

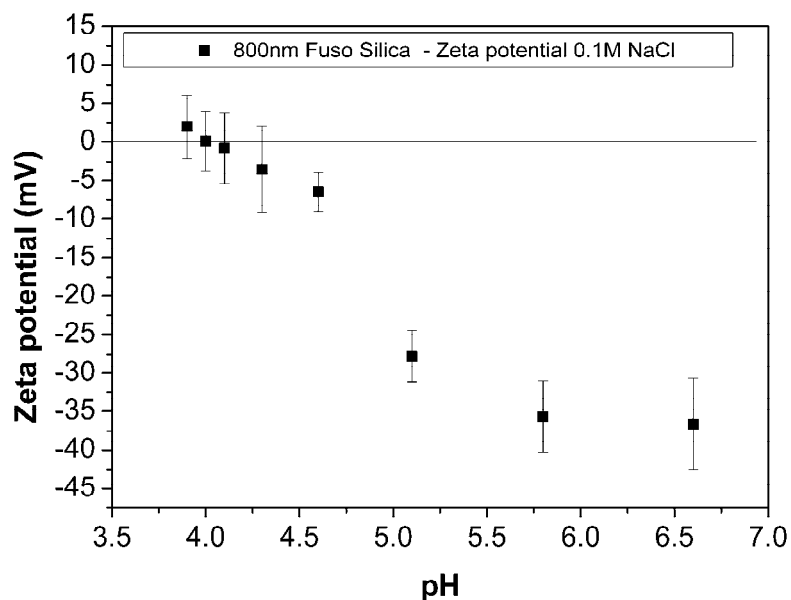

Figure A – Illustrating the changes in zeta potential of FUSO 800nm Silica colloids as a function of pH at an electrolyte concentration of 0.1M NaCl.

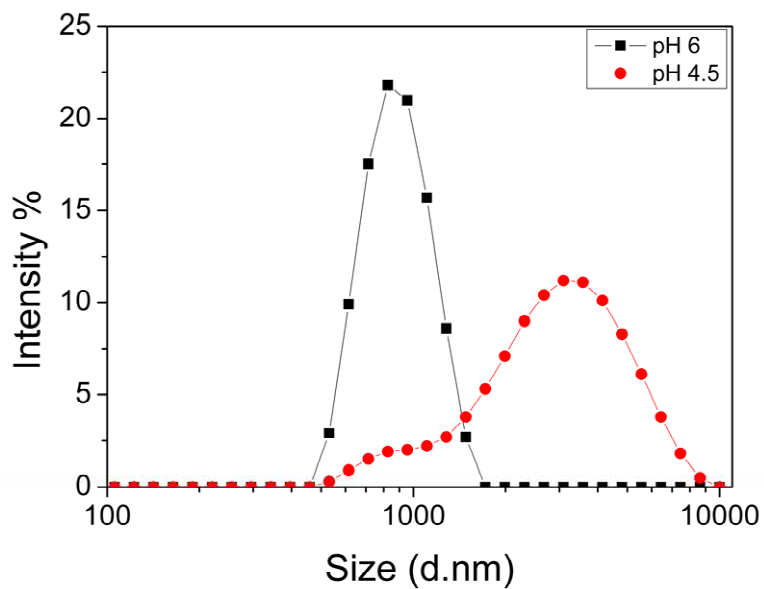

Figure B – Illustrating the size distribution of FUSO 800nm Silica colloids at 2 different pH values. Aggregation is observed pH 4.5 whilst at pH 6 the particles remain monodisperse in an electrolyte concentration of 0.01M NaCl.

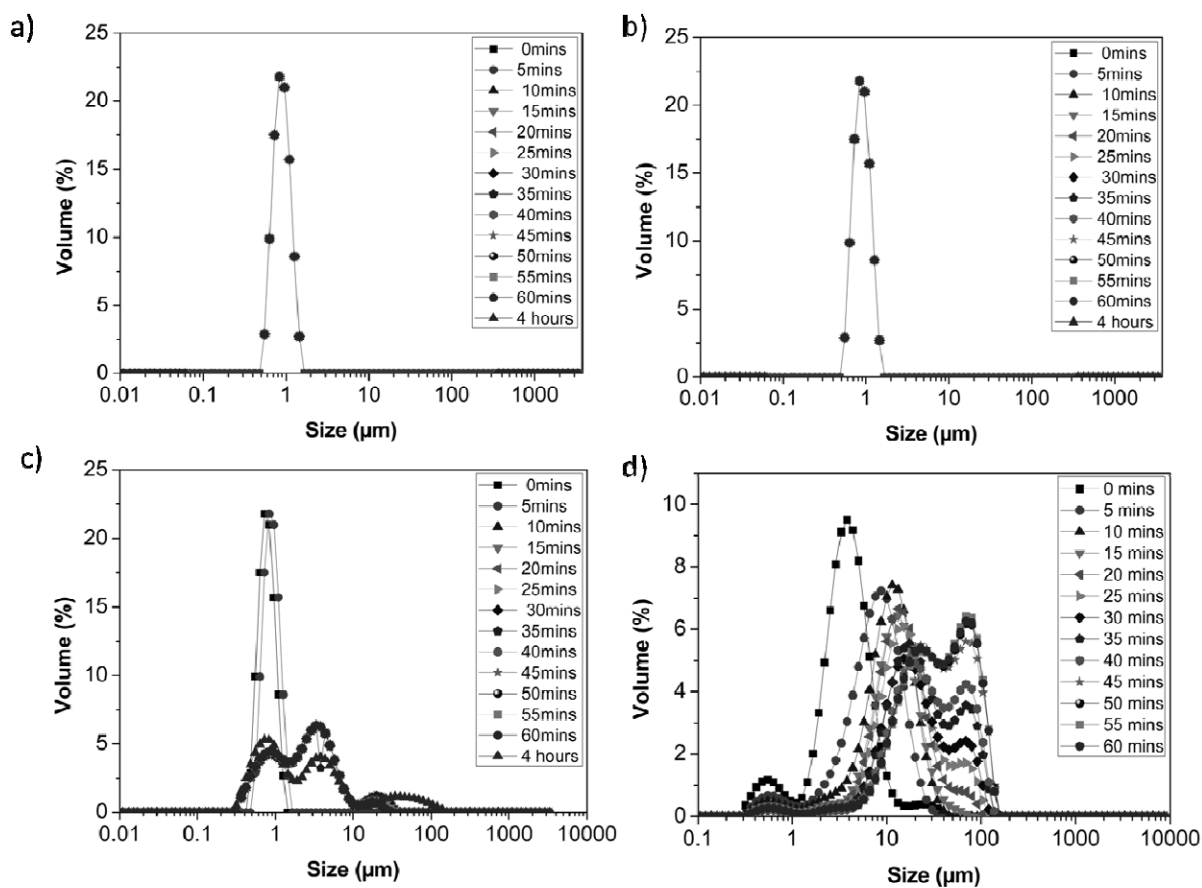

Figure C – Variation in size distribution of FUSO 800nm Silica colloids dispersed in pH 6 water over time at 4 different electrolyte concentrations; a) no added electrolyte, b) 0.01M, c) 0.1M and d) 1M NaCl.

### Diffusion limited process calculations

**Assuming ideal dispersion of primary particles with radius = 400nm**

#### Total number of particles

Total mass of particles in the continuous phase (@4wt% in 25ml) = 1g =  $1 \times 10^{-3}$  kg

Volume of 1 particle (particle radius = 400nm),  $V = \frac{4}{3}\pi r^3 = 2.68 \times 10^{-19}$  m<sup>3</sup>

Density of Fuso Silica =  $2600 \text{ kg m}^{-3}$

Mass of 1 particle = Density  $\times$  Volume =  $6.97 \times 10^{-16}$  kg

Total no of particles in 25ml @4wt% =  $\frac{\text{Total mass of particles}}{\text{Mass of 1 particle}} = 1.44 \times 10^{12}$

#### Droplet Coverage

Volume of oil droplet (radius =  $75 \times 10^{-6}$  m),  $V = \frac{4}{3}\pi r^3 = 1.77 \times 10^{-12}$  m<sup>3</sup>

Total volume of dispersed phase = 5ml =  $5 \times 10^{-6}$  m<sup>3</sup>

Total no of droplets (with radius =  $75 \times 10^{-6}$  m) =  $\frac{\text{Total volume of dispersed phase}}{\text{Volume of 1 droplet}} = 2829655$

Surface area of droplet,  $A = 4\pi r^2 = 7.1 \times 10^{-8}$  m<sup>2</sup>

Area occupied by HCP packing (particle radius = 400nm) =  $5.54 \times 10^{-13}$  m<sup>2</sup>

No of particles to cover all droplets =  $\frac{\text{Total no. of droplets} \times \text{surface area of 1 droplet}}{\text{Area occupied by HCP packing}} = 3.6 \times 10^{11}$

No of particles to cover 1 droplet (monolayer) =  $1.3 \times 10^5$

#### Diffusion of particles

Diffusion Coefficient,  $D = \frac{k_B T}{6\pi\eta r} = 5.36 \times 10^{-13} \text{ m}^2 \text{ s}^{-1}$

Debye length (background electrolyte concentration = 0.1mol/L),  $\kappa = 1\text{nm} = 1 \times 10^{-9}$  m

$$\text{Time for diffusion, } t = \frac{x^2}{2D} = 9.33 \times 10^{-7} \text{ s}$$

#### Lifetime of droplet on membrane

$$\text{Volumetric flowrate, } Q = 0.1 \text{ mlmin}^{-1} = 1.67 \times 10^{-9} \text{ m}^3 \text{ s}^{-1}$$

$$\text{Volume of 1 droplet (150}\mu\text{m)} = 1.77 \times 10^{-12} \text{ m}^3$$

$$\text{Lifetime of droplet on membrane} = 1.06 \times 10^{-3} \text{ s}$$

If assuming the smallest droplet size is the same as the pore size i.e. 80 $\mu$ m

$$\text{Volume of 1 droplet (80}\mu\text{m)} = 2.68 \times 10^{-13} \text{ m}^3$$

$$\text{Lifetime of droplet on membrane} = 1.60 \times 10^{-4} \text{ s}$$

#### **Assuming aggregated particulate system with radius = 1.6 $\mu$ m**

##### Total number of particles

$$\text{Total mass of particles in the continuous phase (@4wt% in 25ml)} = 1 \text{ g} = 1 \times 10^{-3} \text{ kg}$$

$$\text{Volume of 1 particle (particle radius = 1.6}\mu\text{m), } V = \frac{4}{3} \pi r^3 = 1.72 \times 10^{-17} \text{ m}^3$$

$$\text{Density of Fuso Silica} = 2600 \text{ kg m}^{-3}$$

$$\text{Mass of 1 particle} = \text{Density} \times \text{Volume} = 4.46 \times 10^{-14} \text{ kg}$$

$$\text{Total no of particles in 25ml @4wt\%} = \frac{\text{Total mass of particles}}{\text{Mass of 1 particle}} = 2.24 \times 10^{10}$$

##### Droplet Coverage

$$\text{Volume of oil droplet (radius = } 75 \times 10^{-6} \text{ m), } V = \frac{4}{3} \pi r^3 = 1.77 \times 10^{-12} \text{ m}^3$$

$$\text{Total volume of dispersed phase} = 5 \text{ ml} = 5 \times 10^{-6} \text{ m}^3$$

$$\text{Total no of droplets (with radius} = 75 \times 10^{-6} \text{ m)} = \frac{\text{Total volume of dispersed phase}}{\text{Volume of 1 droplet}} = 2829655$$

$$\text{Surface area of droplet, } A = 4\pi r^2 = 7.1 \times 10^{-8} \text{ m}^2$$

$$\text{Area occupied by HCP packing (particle radius} = 1.32 \mu\text{m)} = 8.90 \times 10^{-12} \text{ m}^2$$

$$\text{No of particles to cover all droplets} = \frac{\text{Total no. of droplets} \times \text{surface area of 1 droplet}}{\text{Area occupied by HCP packing}} = 2.20 \times 10^{10}$$

$$\text{No of particles to cover 1 droplet (monolayer)} = 7.8 \times 10^3$$

### Diffusion of particles

$$\text{Diffusion Coefficient, } D = \frac{k_B T}{6\pi\eta r} = 1.57 \times 10^{-13} \text{ m}^2 \text{s}^{-1}$$

$$\text{Debye length (background electrolyte concentration} = 0.1 \text{ mol/L), } \kappa = 1 \text{ nm} = 1 \times 10^{-9} \text{ m}$$

$$\text{Time for diffusion, } t = \frac{\kappa^2}{2D} = 3.18 \times 10^{-6} \text{ s}$$

### Lifetime of droplet on membrane

$$\text{Volumetric flowrate, } Q = 0.01 \text{ ml min}^{-1} = 1.67 \times 10^{-9} \text{ m}^3 \text{s}^{-1}$$

$$\text{Volume of 1 droplet (150 } \mu\text{m)} = 1.77 \times 10^{-12} \text{ m}^3$$

$$\text{Lifetime of droplet on membrane} = 1.06 \times 10^{-3} \text{ s}$$

If assuming the smallest droplet size is the same as the pore size i.e. 80  $\mu\text{m}$

$$\text{Volume of 1 droplet (80 } \mu\text{m)} = 2.68 \times 10^{-13} \text{ m}^3$$

$$\text{Lifetime of droplet on membrane} = 1.60 \times 10^{-4} \text{ s}$$
